# Supplementary material
Source: PubMed Central journal article supplement (PMC6472702)
Supplement: NIHMS1008421-supplement-supplemental_information.pdf [file NIHMS1008421-supplement-supplemental_information.pdf]

## Supporting Information for:

### Expanding the Coverage of the Metabolome with Nitrogen-Based NMR

Fatema Bhinderwala,<sup>a,b</sup> Samantha Lonergan,<sup>a</sup> Jade Woods,<sup>a</sup> Chunyi Zhou,<sup>c</sup> Paul D. Fey,<sup>c</sup>  
and Robert Powers<sup>a,b,\*</sup>

<sup>a</sup>*Department of Chemistry, University of Nebraska - Lincoln, Nebraska, USA 68588-0304*

<sup>b</sup>*Nebraska Center for Integrated Biomolecular Communication*

<sup>c</sup>*Center for Staphylococcal Research, Department of Pathology and Microbiology, University of  
Nebraska Medical Center, Omaha, Nebraska, USA 68198-5900*

\*To whom correspondence should be addressed:

Robert Powers  
University of Nebraska-Lincoln  
Department of Chemistry  
722 Hamilton Hall  
Lincoln, NE 68588-0304  
Email: [rpowers3@unl.edu](mailto:rpowers3@unl.edu)  
Phone: (402) 472-3039  
Fax: (402) 472-9402

#### TABLE OF CONTENTS

1. List of chemicals used in this study
2. NMR data collection and processing methods
3. Table of chemical shifts for nitrogen-containing metabolites from 2D <sup>1</sup>H-<sup>15</sup>N HSQC spectra (Table S1).
4. Table of Nitrogen-containing metabolites with low aqueous solubility (Table S2)
5. References

**Chemicals.** Deuterium oxide (99.9% D) was obtained from Sigma Aldrich (Milwaukee, WI). 3-(trimethylsilyl) propionic-2,2,3,3-d<sub>4</sub> acid sodium salt (98% D) (TMSP) was purchased from Cambridge Isotopes (Andover, MA). Potassium phosphate dibasic salt (anhydrous, 99.1% pure) and monobasic salt (crystal, 99.8% pure) were purchased from Fisher Scientific (Fair Lawn, NJ). All compounds used to obtain reference spectra were obtained from Sigma Aldrich (Milwaukee, WI). <sup>15</sup>N-labeled compounds were purchased from Cambridge Isotopes (Andover, MA). <sup>13</sup>C labeled compounds were purchased from Sigma Aldrich (Milwaukee, WI).

**NMR data collection and processing.** One-dimensional (1D) <sup>1</sup>H NMR spectra were collected with 64K data points, a spectrum width of 11160 Hz, 128 scans, and 16 dummy scans using an excitation sculpting pulse sequence to remove the solvent peak.<sup>1</sup> The 2D <sup>1</sup>H-<sup>15</sup>N HSQC spectra were collected with 16 scans, 8 dummy scans, and a 2 s relaxation delay. The spectra were collected with 2K data points and a spectrum width of 11160 Hz in the direct dimension, and 256 data points and a spectrum width of 10645 Hz in the indirect dimension. The 2D <sup>1</sup>H-<sup>13</sup>C HSQC spectra were collected with 16 scans, 16 dummy scans, and a 2 s relaxation delay. The spectra were collected with 2K data points and a spectrum width of 11160 Hz in the direct dimension, and 128 data points and a spectrum width of 29052 Hz in the indirect dimension. The NMR data was Fourier transformed and phased using NMRpipe.<sup>2</sup> Further processing was performed in NMRviewJ (Version 8.0) where spectra were manually analyzed to obtain lists of chemical shifts and peak intensities.<sup>3</sup>

The 2D <sup>1</sup>H-<sup>15</sup>N HSQC reference spectra for nitrogen-containing metabolites were collected with

non-uniform sampling (25% sampling sparsity)<sup>4</sup> at 277.15 K with 32 scans, 16 dummy scans, and a 2 s relaxation delay. The 2D <sup>1</sup>H-<sup>15</sup>N HSQC spectra were collected with 2K data points and a spectral width of 11160 Hz in the direct dimension, and 256 data points and a spectral width of 10645 Hz in the indirect dimension. Spectral widths were adjusted as needed for individual metabolites. The NMR data were Fourier transformed, phased and reconstructed using Topspin 3.5. Further NMR processing was performed in NMRviewJ (Version 8.0) where spectra were manually analyzed to obtain lists of chemical shifts and peak intensities.<sup>3</sup> The 2D <sup>1</sup>H-<sup>15</sup>N HSQC reference spectra were used to annotate the NMR spectra obtained for the *E. coli* and *S. aureus* metabolome extracts.

**Table S1:** Chemical Shifts for Nitrogen-Containing Metabolites from 2D <sup>1</sup>H-<sup>15</sup>N HSQC Spectra

| No. | Metabolite                 | Chemical Shifts (ppm)                                                                        |
|-----|----------------------------|----------------------------------------------------------------------------------------------|
| 1   | 4'-deoxypyridoxine         | 96.3 (10.91)                                                                                 |
| 2   | 5'-ATP                     | 89.2 (8.59), 89.1 (8.57)                                                                     |
| 3   | 5-azacytidine              | 72.9 (6.4), 82.4 (7.54), 82.5 (7.54), 109.2 (7.78), 105.5 (7.86), 105.2 (7.66), 106.3 (7.40) |
| 4   | 5'-CMP                     | 103.19 (8.96), 103.19 (8.09)                                                                 |
| 5   | B-alanine                  | 31.4 7.32                                                                                    |
| 6   | choline                    | 136.2 (2.91)                                                                                 |
| 7   | creatine phosphate         | 101.5 (6.44)                                                                                 |
| 8   | cytosine                   | 99.2 (8.12)                                                                                  |
| 9   | D-galactosamine HCl        | 31.2 (7.90)                                                                                  |
| 10  | D-gluconic acid            | 118.7 (3.38)                                                                                 |
| 11  | D-glucosamine 6- phosphate | 34.0 (7.87), 34.0 (7.92)                                                                     |
| 12  | D-glucosamine HCl          | 34.0 (7.83)                                                                                  |
| 13  | GABA                       | 32.6 (7.33)                                                                                  |
| 14  | L-alanine                  | 36.0 (7.60)                                                                                  |
| 15  | L-arginine                 | 128.6 (7.78,8.08)                                                                            |
| 16  | L-asparagine               | 111.8(7.44), 111.4(6.69), 39.4 (7.68)                                                        |
| 17  | L-aspartic acid            | 38.3 (7.78)                                                                                  |
| 18  | L-citrulline               | 86.9 (6.17), 39.5 (7.56)                                                                     |
| 19  | L-cysteine                 | 38.4 (7.67), 20.64 (6.84)                                                                    |
| 20  | L-glutamic acid            | 40.1 (7.69)                                                                                  |
| 21  | L-glutamine                | 112.2 (7.39), 112.2 (6.69), 40.2 (7.65), 20.2 (6.82)                                         |
| 22  | L-glycine                  | 42.4 (7.49)                                                                                  |
| 23  | L-histidine                | 129.5 (7.88)                                                                                 |
| 24  | L-isoleucine               | 36.7 (7.41)                                                                                  |
| 25  | L-leucine                  | 39.6 (7.51)                                                                                  |
| 26  | L-lysine                   | 61.2 (8.03)                                                                                  |
| 27  | L-methionine               | 39.7 (7.6)                                                                                   |
| 28  | L-ornithine                | 32.2 (7.38), 40.1 (7.62)                                                                     |

|    |                           |                                                                                                                                                                                      |
|----|---------------------------|--------------------------------------------------------------------------------------------------------------------------------------------------------------------------------------|
| 29 | L-phenylalanine           | 38.8 (7.44), 50.7 (6.96)                                                                                                                                                             |
| 30 | L-proline                 | 54.9 (7.69), 54.9 (8.57)                                                                                                                                                             |
| 31 | L-serine                  | 35.67 (3.60)                                                                                                                                                                         |
| 32 | L-threonine               | 37.8 (7.58)                                                                                                                                                                          |
| 33 | L-tryptophan              | 35.8 (7.40), 42.5 (7.50)                                                                                                                                                             |
| 34 | L-tyrosine                | 38.4 (7.50), 130.0 (9.95)                                                                                                                                                            |
| 35 | L-valine                  | 30.0 (7.45)                                                                                                                                                                          |
| 36 | NAD                       | 110.1 (7.53,8.46)                                                                                                                                                                    |
| 37 | nicotinic acid            | 15.3 (7.76)                                                                                                                                                                          |
| 38 | pantothenic acid          | 121.9 (7.84), 31.4 (7.31), 121.9 (3.11)                                                                                                                                              |
| 39 | pyridoxine                | 18.3 (7.2), 164.5 (2.00), 177.7 (2.00)                                                                                                                                               |
| 40 | sialic acid               | 124.1 (7.91)                                                                                                                                                                         |
| 41 | thiamine HCl              | 107.0 (8.21,8.23), 226.6 (9.33), 234.8 (7.71)                                                                                                                                        |
| 42 | thymine                   | 131.9 (10.40), 157.5 (10.78)                                                                                                                                                         |
| 43 | trans-4-hydroxy-L-proline | 52.0 (9.15,7.85)                                                                                                                                                                     |
| 44 | UMP                       | 215.0 (7.73), 185.2 (7.75)                                                                                                                                                           |
| 45 | uracil                    | 134.4 (10.63)                                                                                                                                                                        |
| 46 | urea                      | 76.9 (5.91)                                                                                                                                                                          |
| 47 | ureidosuccinic acid       | 88.8 (6.59), 96.0 (7.73)                                                                                                                                                             |
| 48 | uric acid                 | 144.8 (7.24)                                                                                                                                                                         |
| 49 | UTP                       | 185.2 (7.75)                                                                                                                                                                         |
| 50 | vitamin B12               | 114.0 (7.72), 121.7 (7.95), 121.4 (8.05), 119.5 (7.60), 113.2 (7.54), 112.7 (7.43), 113.3 (6.81), 114.1 (6.84), 119.5 (6.92), 121.4 (6.91), 113.4 (6.66), 110.3 (6.21), 110.4 (6.15) |

**Table S2:** Nitrogen-containing metabolites with low aqueous solubility

| No. | Metabolite             |
|-----|------------------------|
| 1   | adenine                |
| 2   | 5'-ADP                 |
| 3   | allopurinol            |
| 4   | 5'-AMP                 |
| 5   | 2'-dAMP                |
| 6   | IMP                    |
| 7   | 2'-dGMP                |
| 8   | 1,3-dimethyl uric acid |
| 9   | 1,7-dimethylxanthine   |
| 10  | cyclic GMP             |
| 11  | 5'-GTP                 |
| 12  | oxypurinol             |
| 13  | pyridoxal-5'-phosphate |
| 14  | TMP                    |
| 15  | UTP                    |

## REFERENCES

- (1) Schleucher, J.; Schwendinger, M.; Sattler, M.; Schmidt, P.; Schedletzky, O.; Glaser, S. J.; Sorensen, O. W.; Griesinger, C. *J Biomol NMR* **1994**, *4*, 301-306.
- (2) Delaglio, F.; Grzesiek, S.; Vuister, G. W.; Zhu, G.; Pfeifer, J.; Bax, A. *Journal of Biomolecular NMR* **1995**, *6*, 277-293.
- (3) Johnson, B. A.; Blevins, R. A. *J. Biomol. NMR* **1994**, *4*, 603-614.
- (4) Worley, B.; Powers, R. *Journal of Magnetic Resonance* **2015**, *261*, 19-26.
